# Supplementary material
Source: PubMed Central journal article supplement (PMC4385181)
Supplement: mmc1.pdf [file mmc1.pdf]

The American Journal of Human Genetics

Supplemental Data

**Mutations in *TUBGCP4* Alter Microtubule Organization  
via the  $\gamma$ -Tubulin Ring Complex in Autosomal-Recessive  
Microcephaly with Chorioretinopathy**

Sophie Scheidecker, Christelle Etard, Laurence Haren, Corinne Stoetzel, Sarah Hull, Gavin Arno, Vincent Plagnol, Séverine Drunat, Sandrine Passemard, Annick Toutain, Cathy Obringier, Mériam Koob, Véronique Geoffroy, Vincent Marion, Uwe Strähle, Pia Ostergaard, Alain Verloes, Andreas Merdes, Anthony T. Moore, and Hélène Dollfus

**Figure S1: Synonymous mutation analysis showing residual expression of *TUBGCP4*.**

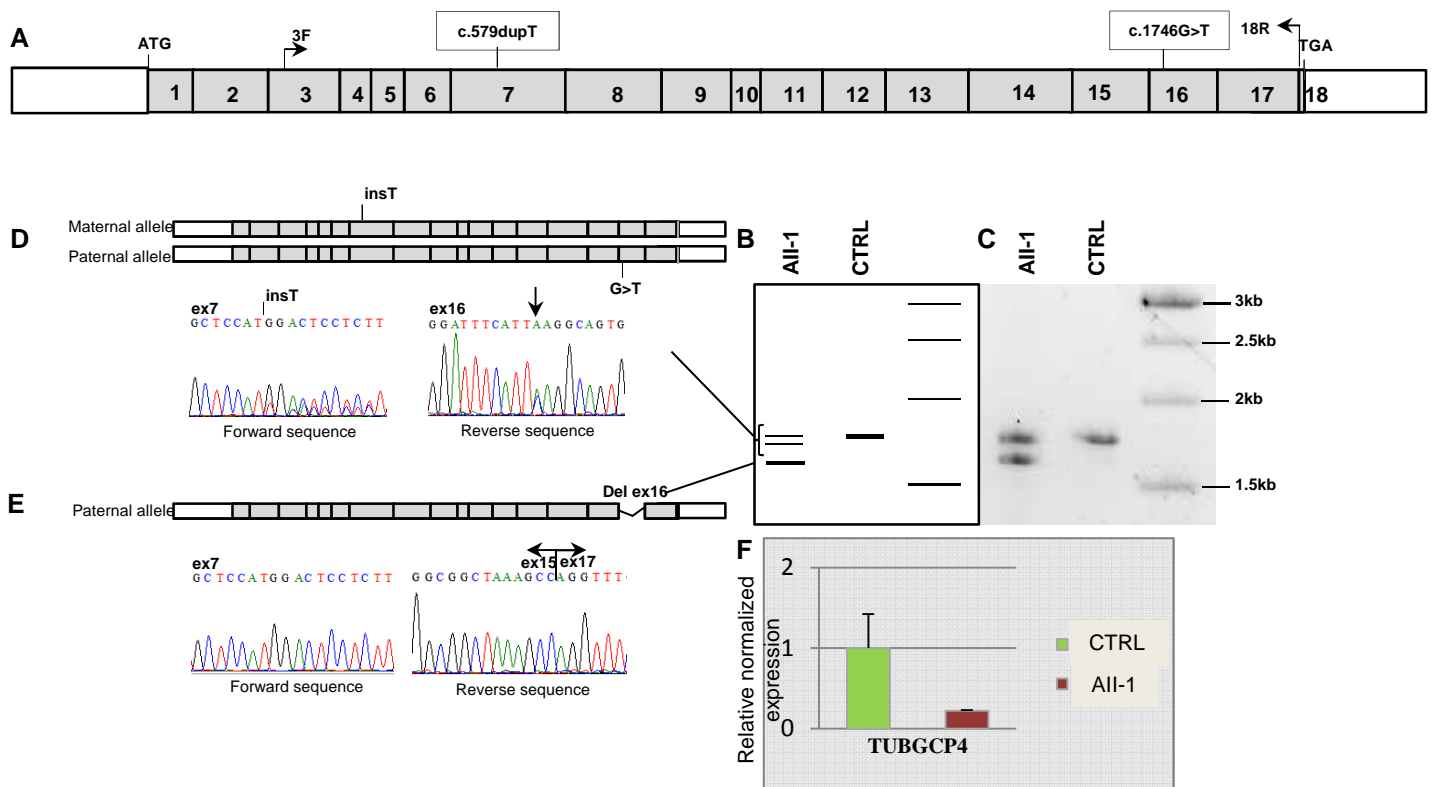

cDNA was obtained from individual AII-1 skin fibroblasts and from a healthy control (CTRL).

A) Schematic representation of the exon structure of human *TUBGCP4*, with indications of: positions of start codon (ATG), stop codon (TGA), mutations in exon 7 and exon 16 as well as the primers used for this assay forward primer (3F) and reverse primer (18R).

B) Schematic representation of the electrophoresis gel, the two bands identified on the drawing by the bracket cannot be distinguished on the gel (their lengths differ only by 1bp because of the insertion of one T).

C) Electrophoresis gel showing the PCR amplification of 1.7kb cDNA using primers in exon 3 and exon 18.

D) Sequence reads of the 2 indivisible PCR products showing the presence of the mutated exon 7 maternal allele and the mutated exon 16 paternal allele ascertaining the residual presence of a functional exon 16 due to an alternative exon 16 skipping.

E) Sequence read of the exon 16 paternal allele with the total exon 16 skipping compared to the control.

F) Quantitative PCR (using exon 14 to exon 16 primers) showing the drastic reduction of the cDNA level for the affected individual compared to three controls.

**Figure S2: Individual AII-1 fibroblasts have reduced staining of g-tubulin, bipolar spindles and show decreased microtubule nucleation**

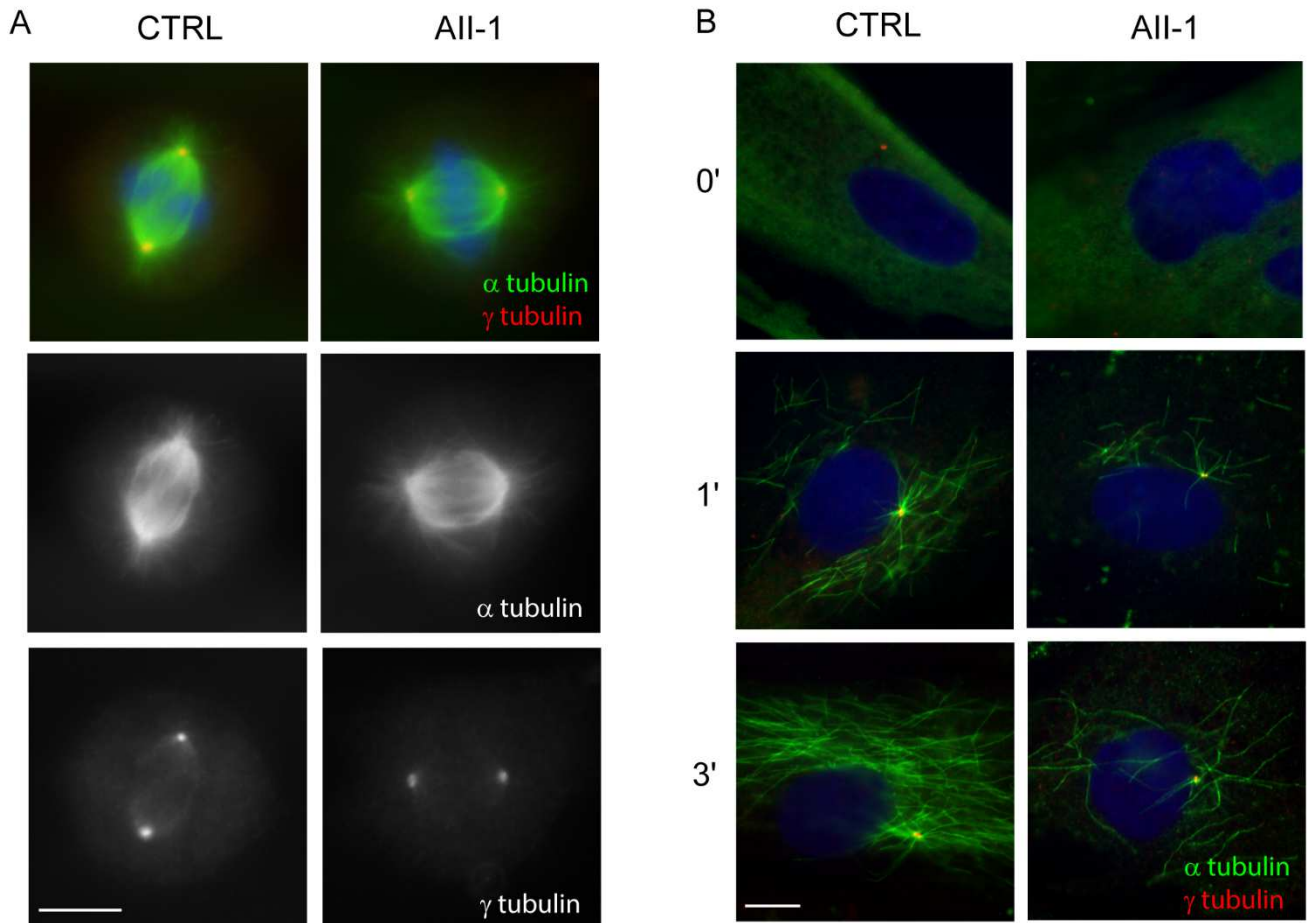

A) Immunofluorescence of microtubules (green) and  $\gamma$  tubulin (red) show bipolar spindles with reduced amounts of g-tubulin in AII-1 mitotic fibroblasts compared to control.

B) Microtubule regrowth assay show decreased microtubule nucleation in AII-1 fibroblasts compared to control. Cells were exposed to cold and reheated for 0, 1 or 3 minutes at 25°C before permeabilisation, fixation and immunofluorescence of microtubules (green) and  $\gamma$  tubulin (red). Microtubules nucleated from the centrosome and from the Golgi apparatus are visible.

DNA is blue in merged images, scale bars: 10  $\mu$ m.

**Figure S3: splice morpholinos fail to generate a continuous photoreceptors layer**

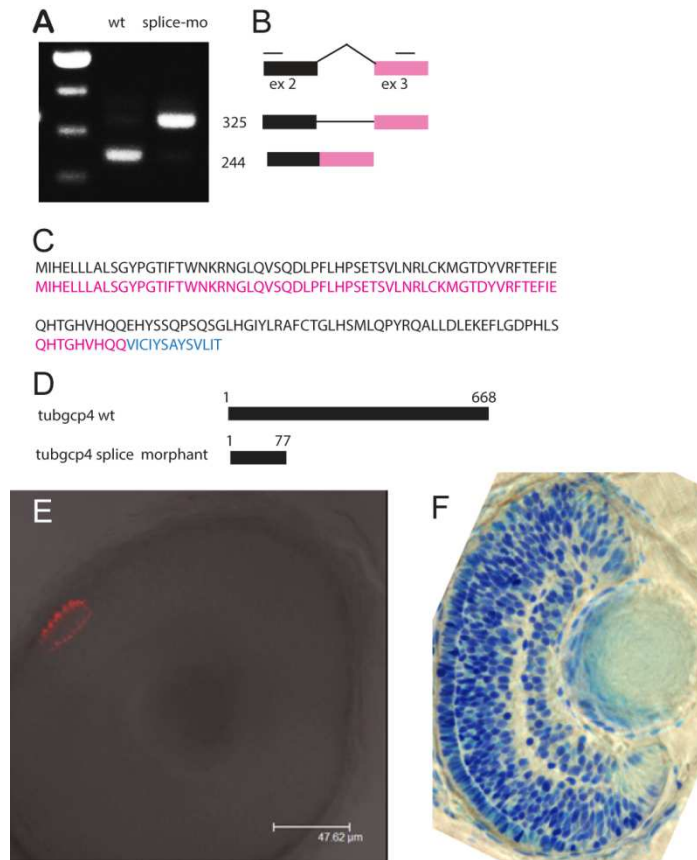

A-D) tubgcp4 splice morpholino generate a truncated protein. A : PCR made with cDNA of controls embryos (wt) or tubgcp4 splice morpholinos injected embryos (splice-mo) amplify a bigger band in the morphant (325 bp) compared to the control (244 bp). B : 244 corresponds to correct splicing of the intron 2-3, whereas in morphant, the intron is kept. thin black bars indicate the place of primers. C : the failed splicing generates a premature stop codon. Blue indicates the amino acid that diverge from the control sequence. D : a 77 amino acids protein is generated in morphant whereas the full length sequence should contain 668 amino acids.

E-F) Zpr1 staining showing only single patch of photoreceptor in splice morphant at 72 hpf (E). Scale bar : 47mm. F : 5 mm plastic section of E showing presence of photoreceptors layers.

**Table S1: Summary of the exome sequencing results from Family A**

| Individuals                                                                                                                                                                                         | AII-1                                                                                          |       | AII-3 |       | AII-2 |       | AI-2  |       |
|-----------------------------------------------------------------------------------------------------------------------------------------------------------------------------------------------------|------------------------------------------------------------------------------------------------|-------|-------|-------|-------|-------|-------|-------|
|                                                                                                                                                                                                     | SNV                                                                                            | Indel | SNV   | Indel | SNV   | Indel | SNV   | Indel |
| Total number of variants                                                                                                                                                                            | 51723                                                                                          | 8318  | 52151 | 8279  | 53804 | 8393  | 51998 | 8207  |
| After exclusion of non-pathogenic variants (as determined from the ClinicalSignificance field in dbSNP) validated by at least 2 methods in dbSNP (as determined from the "Validation Status" field) | 7103                                                                                           | 5991  | 7082  | 5983  | 9498  | 6083  | 7060  | 5909  |
| After exclusion of variants with an allele frequency > 1% (extracted from the dbSNP database and the Exome Variant Server)                                                                          | 6731                                                                                           | 5257  | 6696  | 5289  | 9133  | 5371  | 6687  | 5237  |
| After exclusion of variants found in the homozygous state + exclusion of variants found more than once in the heterozygous state in 48 control exomes                                               | 1418                                                                                           | 1084  | 1354  | 1107  | 4175  | 1250  | 1299  | 1083  |
| After exclusion of 5'UTR, 3'UTR, downstream, upstream and intron locations without local splice effect prediction (from the "localSpliceEffect" field of Alamut-Batch)                              | 614                                                                                            | 215   | 537   | 200   | 2112  | 315   | 529   | 193   |
| After exclusion of synonymous variants without local splice effect prediction (from the "localSpliceEffect" field of Alamut-Batch)                                                                  | 487                                                                                            | 215   | 430   | 200   | 1655  | 315   | 423   | 193   |
| After selection of variants consistent with recessive transmission (compound heterozygous, homozygous variants).                                                                                    | <b>3 compound heterozygous (in the <i>TUBGCP4</i>, <i>TRPM2</i>, and <i>ERICH6B</i> genes)</b> |       |       |       |       |       |       |       |

**Table S2: Primers table**

| RefSeq Gene | Gene                  | Forward (5'-3')            | Reverse (5'-3')            | size   |
|-------------|-----------------------|----------------------------|----------------------------|--------|
| NM_014444   | TUBGCP4-ex1           | GTTGAGCTGCCGAACTTCC        | GCCTCTCTAGGTGTCGCATC       | 472bp  |
|             | TUBGCP4-ex2-3         | GGATAGGGAACCCCTTTGAA       | ACTGTACCTTCCAGCCATGC       | 831bp  |
|             | TUBGCP4-ex4           | ATAAGAGCCCTGGCTTGGTT       | GGCTCTGAATCCAGAAGAAAAA     | 346bp  |
|             | TUBGCP4-ex5           | CTGGCCAAAATGGTGAAAC        | AAAAACTACTAAAACTAGGGTCTTCG | 580bp  |
|             | TUBGCP4-ex6           | CTGCTGATGGGAGAGAGGTC       | TCCTCTGCTCATGGAGCTTT       | 396bp  |
|             | TUBGCP4-ex7           | GGCTGCAAATATGGAAATTCA      | TGATGGAAGGTGCTCAGCTA       | 489bp  |
|             | TUBGCP4-ex8           | TGTGCAACACCAGATTTGAAG      | TTATCGACCACTCGCTCTGA       | 396bp  |
|             | TUBGCP4-ex9           | TCAGAGCGAGTGGTCGATAA       | GCCTCCCAAAGTGTGAGAC        | 453bp  |
|             | TUBGCP4-ex10-11       | TTTTTCTATGTGGGGCAAGG       | CAAGAGCCTTCCATCTCTGG       | 850bp  |
|             | TUBGCP4-ex12          | ATGTCCACTGTGTCCTGCTG       | AGCCTCTCTGGACTTCTGGA       | 400bp  |
|             | TUBGCP4-ex13          | TTTTAGTAGAGATGGGGTTTCACTG  | GCTCTGGACTAGCTGGGATT       | 400bp  |
|             | TUBGCP4-ex14          | GGGTGGCACAAAGTCCTAGA       | CCCAAACCCACCATTTTAT        | 380bp  |
|             | TUBGCP4-ex15          | AGGGAGGGGGTTCAGAATTA       | GAGACGGGTTTTCACCATGT       | 589bp  |
|             | TUBGCP4-ex16          | TCAGATTTGGGAGGTCAGCTA      | TGCTTATTTGATGGGCTGAA       | 481bp  |
|             | TUBGCP4-ex17          | GAAGGCCAGGTGGTTCTGTA       | TTGGACTAAAGTCTTCTCCAGTTC   | 360bp  |
|             | TUBGCP4-ex18          | CAGAAGAGTCAAAAGAACTCTTCAGT | TCCTGGATGTTTCAGTAACTGCT    | 300bp  |
|             | TUBGCP4-RT (ex14->16) | ATCACATGGCATTTTTGGTG       | ATCCAGTGGGCCTAGGTCT        | 269bp  |
|             | TUBGCP4-RT-EX3F-18R   | TGCACAGGGCTGGATTCTGT       | GAAACTGCCAGAGTCCAC         | 1720bp |

**Table S3: Morpholinos sequences**

|                   |                            |
|-------------------|----------------------------|
| tubgcp4-mo start  | AAGCCAACAGCAACTCGTGAATCAT  |
| tubgcp4-mo splice | GCAGAGTAAATGCAGATTACCTGTT  |
| cont 1            | GATAGATTCACTTCACCTGCCGCAT  |
| cont 2            | CACGCACAGTTTACTGATCATTGT   |
| cont3             | ATCAAAACGATATTTTCGGTATGACT |
